# Supplementary material for: Hydrogen-substituted graphdiyne/graphene as an sp/sp2 hybridized carbon interlayer for lithium–sulfur batteries
Source: Royal Society of Chemistry journal article supplement (doi:10.1039/d0nr07878f), 2021-01-01
Supplement: d0nr07878f1.pdf [file d0nr07878f1.pdf]

## Supporting Information

### Hydrogen-Substituted Graphdiyne/Graphene as $sp/sp^2$ Hybridized Carbon Interlayer for Lithium–Sulfur Batteries

*Suzhen Kong,<sup>a†</sup> Dong Cai,<sup>a</sup> Guifa Li,<sup>b</sup> Xiangju Xu,<sup>\*a</sup> Suya Zhou,<sup>a</sup> Xinwei Ding,<sup>a</sup> Yongqin Zhang,<sup>b</sup> Shuo Yang,<sup>ac</sup> Xuemei Zhou,<sup>a</sup> Huagui Nie,<sup>a</sup> Shaoming Huang,<sup>d</sup> Ping Peng,<sup>e</sup> and Zhi Yang<sup>\*a</sup>*

<sup>a</sup> Key Laboratory of Carbon Materials of Zhejiang Province, Wenzhou University, Wenzhou 325035, China

\* E-mail: [xuxj@wzu.edu.cn](mailto:xuxj@wzu.edu.cn); [yang201079@126.com](mailto:yang201079@126.com)

<sup>b</sup> School of Material Science and Engineering, Nanchang Hangkong University, Jiangxi, 330063, China

<sup>c</sup> College of Electrical and Electronic Engineering, Wenzhou University, Wenzhou 325035, China

<sup>d</sup> School of Materials and Energy, Guangdong University of Technology, Guangzhou 510006, China

<sup>e</sup> School of Material Science and Engineering, Hunan University, Hunan, 410082, China

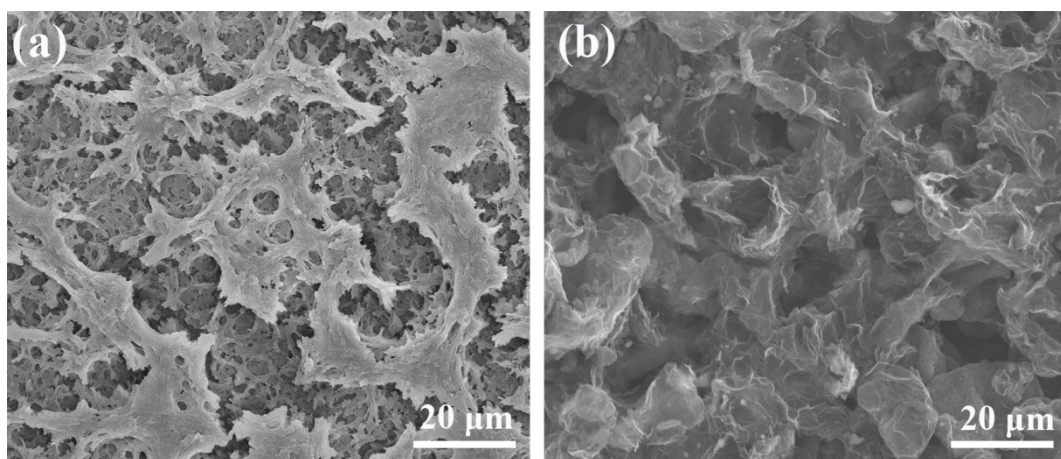

**Fig. S1** The morphology of the HsGDY a) and Gra-HsGDY b) by SEM images. Crosslinked structures are observed for the Gra-HsGDY sample, implying better film-forming property.

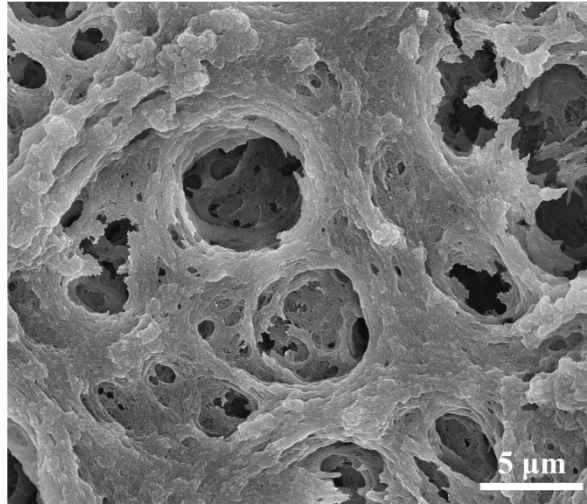

**Fig. S2** SEM image of HsGDY.

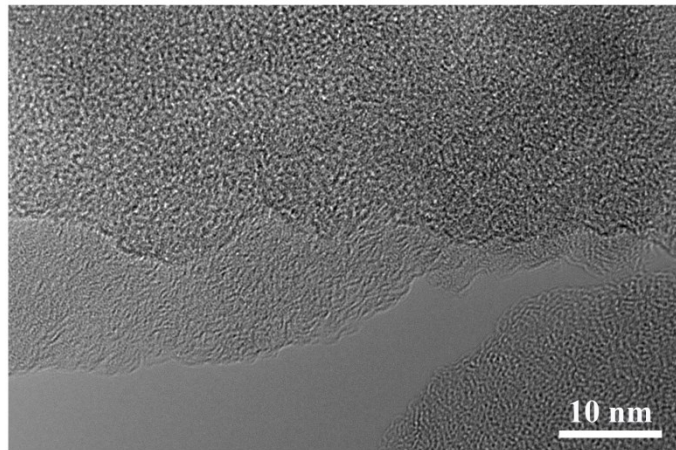

**Fig. S3** TEM image of HsGDY.

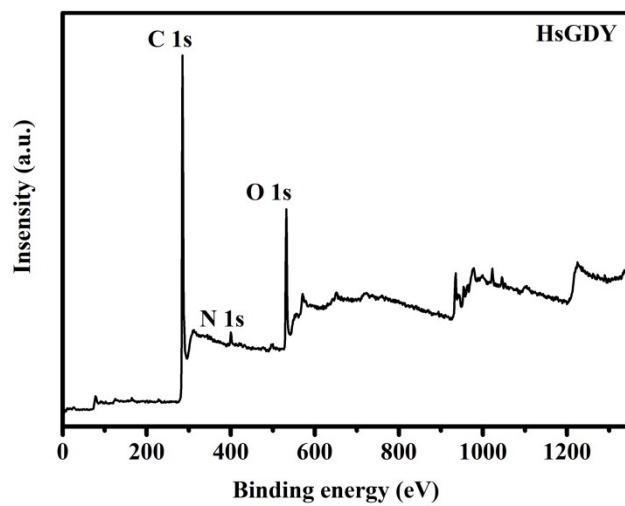

**Fig. S4** XPS survey spectra of HsGDY.

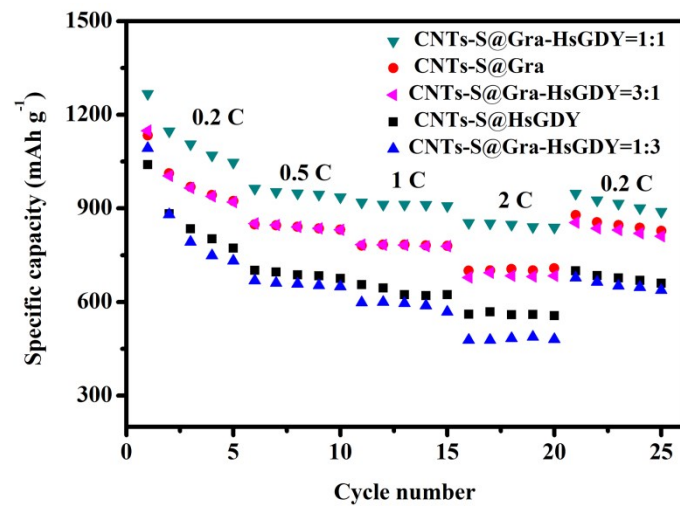

**Fig. S5** The rate performances of CNTs-S@Gra-HsGDY with different mass ratios of Gra to HsGDY.

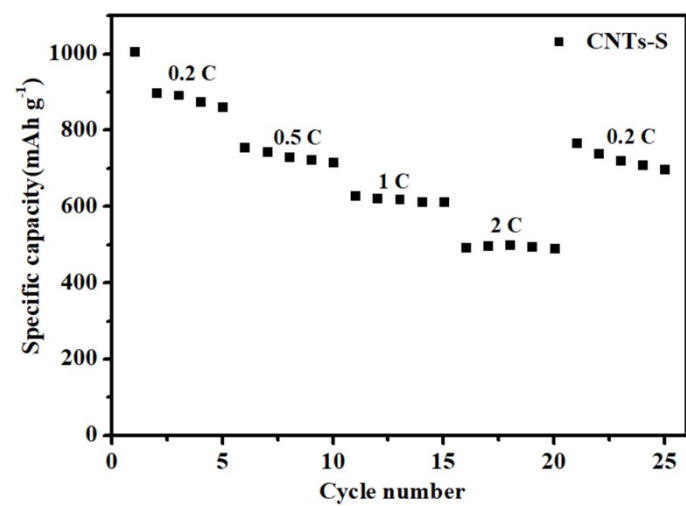

**Fig. S6** The rate performance of the CNTs-S cathode at 0.2 to 2 C.

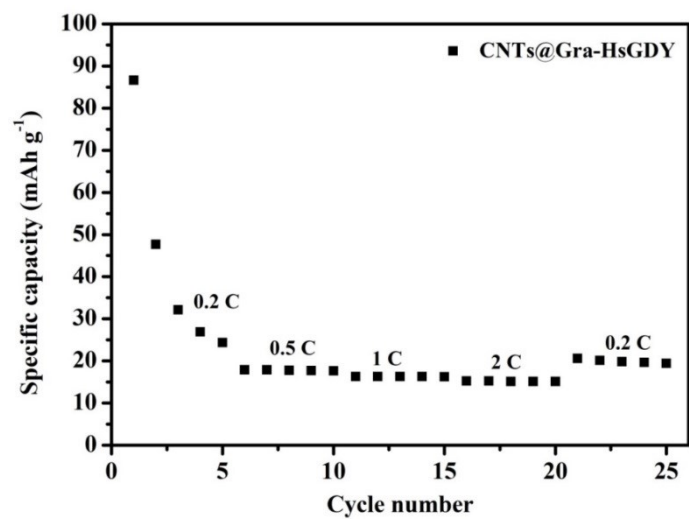

**Fig. S7** Rate performance of the CNTs@Gra-HsGDY electrode without any sulfur loading.



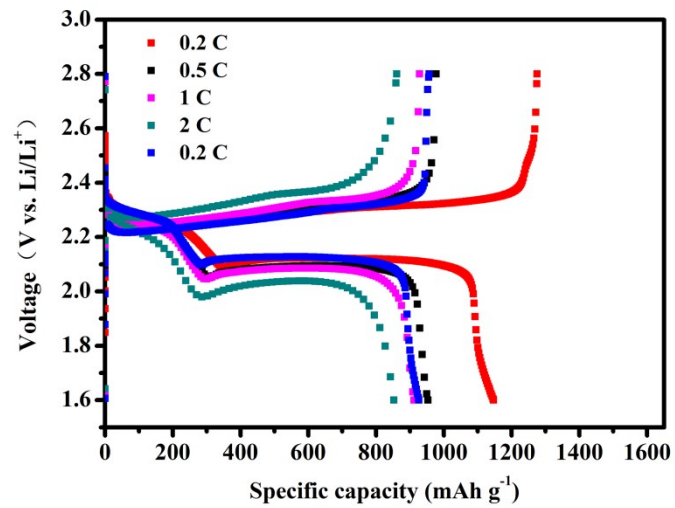

**Fig. S8** The galvanostatic discharge-charge plots of CNTs-S@Gra-HsGDY under various current rates.

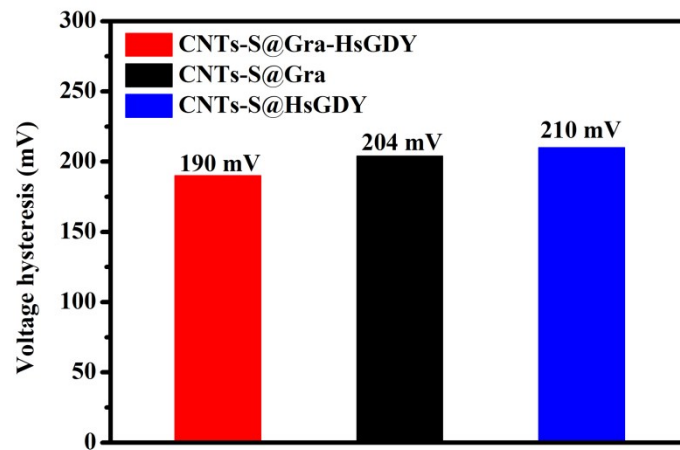

**Fig. S9** Comparison of voltage hysteresis of the three samples obtained from the galvanostatic charge-discharge profiles at 0.2 C in Fig. 2d

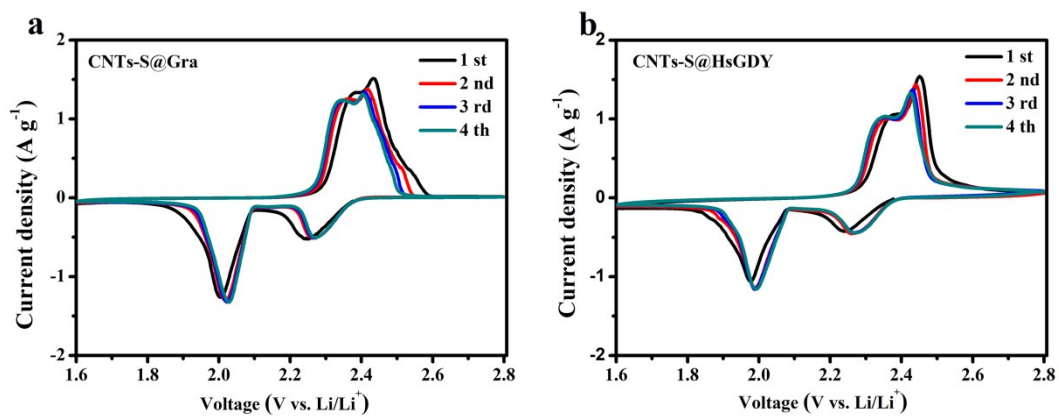

**Fig. S10** (a-b) CVs of CNTs-S@Gra and CNTs-S@Gra-HsGDY between 1.6 and 2.8 V for the initial four cycles, respectively, recorded at a scan rate of  $0.1 \text{ mV s}^{-1}$ .

**Table S1** Voltage hysteresis and collection coefficient of the three samples obtained from the CV profiles in Fig. 3d.

| <b>Sample</b>           | <b>Polarized voltage (<math>\Delta V</math>)</b> | <b>Collection coefficient (<math>I_L/I_H</math>)</b> |
|-------------------------|--------------------------------------------------|------------------------------------------------------|
| <b>CNTs-S@ HsGDY</b>    | 0.38                                             | 2.44                                                 |
| <b>CNTs-S@Gra</b>       | 0.35                                             | 2.49                                                 |
| <b>CNTs-S@Gra-HsGDY</b> | 0.32                                             | 2.68                                                 |

**Table S2** Characteristics of various materials reported in literatures.

| Materials                 | Sulfur loading (mg cm <sup>-2</sup> ) | Initial performance |                                 | Cycling performance |        |                              | Ref.      |
|---------------------------|---------------------------------------|---------------------|---------------------------------|---------------------|--------|------------------------------|-----------|
|                           |                                       | Rate (C)            | Capacity (mAh g <sup>-1</sup> ) | Rate (C)            | Cycles | Capacity Decay (% per cycle) |           |
| Sulfonated GO             | 1.2~1.6                               | 0.2                 | 1240                            | 0.5                 | 250    | 0.18                         | 1         |
| MWCNT                     | 1.1                                   | 0.1                 | 1100                            | 0.5                 | 150    | 0.22                         | 2         |
| Graphene                  | 1.21                                  | 0.1                 | 1100                            | 0.1                 | 100    | 0.283                        | 3         |
| Super P                   | 0.7                                   | 0.2                 | 1151                            | 0.2                 | 200    | 0.185                        | 4         |
| rGO                       | 1.1                                   | 0.2                 | 1070                            | 0.2                 | 200    | 0.185                        | 5         |
| Porous Carbon             | 1.5                                   | 0.2                 | 1166                            | 0.5                 | 200    | 0.20                         | 6         |
| Acetylene Black           | 1.0-1.3                               | 0.5                 | 939                             | 1                   | 200    | 0.20                         | 7         |
| PPy nanotube              | 2.5-3                                 | 0.2                 | 1101                            | 0.5                 | 300    | 0.11                         | 8         |
| High-flux GO              | 1-1.2                                 | 0.5                 | 1182                            | 0.5                 | 100    | 0.29                         | 9         |
| B-RGO                     | 1.5                                   | 0.1                 | 1227                            | 0.1                 | 300    | 0.15                         | 10        |
| S/CoOOH                   | 1.0-1.3                               | 0.1                 | 1199                            | 1                   | 500    | 0.09                         | 11        |
| CNT@TiO <sub>2-x</sub> -S | 2.2                                   | 0.1                 | 1187                            | 0.2                 | 100    | 0.3                          | 12        |
| CoSe <sub>2</sub> /GO     | 1.0                                   | 0.2                 | 1331                            | 6                   | 500    | 0.1                          | 13        |
| Gra-HsGDY                 | 1.2                                   | 0.2                 | 1267                            | 1                   | 500    | 0.089                        | This work |

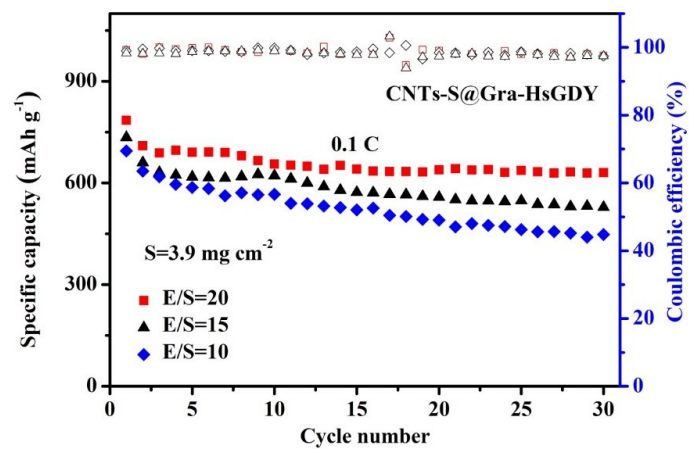

**Fig. S11** Cycling stability of CNTs-S@Gra-HsGDY at 0.1 C with sulfur loading of  $\sim 3.9 \text{ mg cm}^{-2}$  under various E/S ratios.

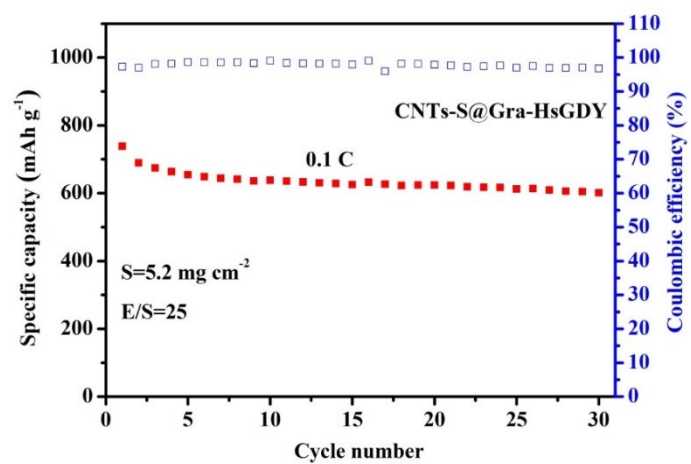

**Fig. S12** Cycling performance of the CNTs-S@Gra-HsGDY at 0.1 C with a higher sulfur loading of 5.2 mg cm<sup>-2</sup> for 30 cycles.

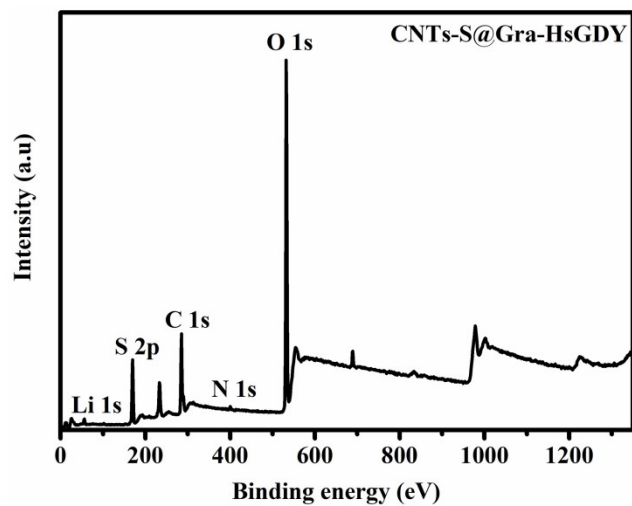

**Fig. S13** XPS survey spectra of CNTs-S@Gra-HsGDY during the fifth cycle.



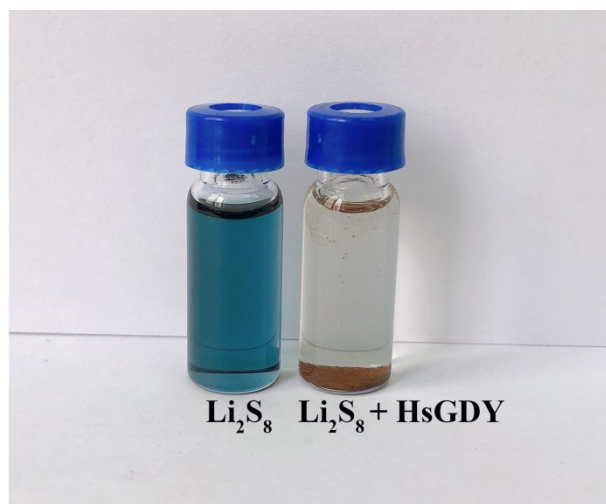

**Fig. S14** LiPSs adsorption tests of HsGDY. 0.5 mM  $\text{Li}_2\text{S}_8$  solution was prepared by mixing  $\text{Li}_2\text{S}$  and  $\text{S}_8$  powder in DMSO. Afterwards, HsGDY (3 mg) were added into 1 mL  $\text{Li}_2\text{S}_8$  (0.5 mM) solution and kept standing for 48 hours.

**Table S3** Adsorption energy of  $\text{Li}_2\text{S}_n$  ( $n=2,4,6,8$ ) molecule on HsGDY flake, wherein “I” means the  $\text{Li}_2\text{S}_n$  molecule adsorbed on the  $\text{sp}$  hybridized carbon of HsGDY, and “II” represents the  $\text{Li}_2\text{S}_n$  molecule adsorbed on the  $\text{sp}^2$  hybridized carbon of HsGDY.

|                                    | $E_{\text{total}}$ | $E_{\text{HsGDY}}$ | $E_{\text{Li}_2\text{S}_2}$ | $E_{\text{Li}_2\text{S}_4}$ | $E_{\text{Li}_2\text{S}_6}$ | $E_{\text{Li}_2\text{S}_8}$ | $E_{\text{ads}} \text{ (eV)}$ |
|------------------------------------|--------------------|--------------------|-----------------------------|-----------------------------|-----------------------------|-----------------------------|-------------------------------|
| HsGDY- $\text{Li}_2\text{S}_2$ -I  | -46032.845         | -45460.596         | -570.954                    |                             |                             |                             | -1.295                        |
| HsGDY- $\text{Li}_2\text{S}_2$ -II | -46032.644         | -45460.596         | -570.954                    |                             |                             |                             | -1.094                        |
| HsGDY- $\text{Li}_2\text{S}_4$ -I  | -46589.189         | -45460.596         |                             | -1127.452                   |                             |                             | -1.141                        |
| HsGDY- $\text{Li}_2\text{S}_4$ -II | -46589.078         | -45460.596         |                             | -1127.452                   |                             |                             | -1.030                        |
| HsGDY- $\text{Li}_2\text{S}_6$ -I  | -47145.076         | -45460.596         |                             |                             | -1683.143                   |                             | -1.337                        |
| HsGDY- $\text{Li}_2\text{S}_6$ -II | -47144.979         | -45460.596         |                             |                             | -1683.143                   |                             | -1.240                        |
| HsGDY- $\text{Li}_2\text{S}_8$ -I  | -47700.379         | -45460.596         |                             |                             |                             | -2238.573                   | -1.209                        |
| HsGDY- $\text{Li}_2\text{S}_8$ -II | -47700.099         | -45460.596         |                             |                             |                             | -2238.573                   | -0.929                        |

## References:

- 1 Y. Lu, S. Gu, J. Guo, K. Rui, C. Chen, S. Zhang, J. Jun, J. Yang and Z. Wen, *ACS Appl. Mater.* 2017, **9**, 14878-14888.
- 2 J. H. Kim, G. Y. Jung, Y. H. Lee, J. H. Kim, S. Y. Lee, S. K. Kwak and S. Y. Lee, *Nano Lett.* 2017, **17**, 2220-2228.
- 3 H. Al Salem, G. Babu, C. V. Rao and L. M. Arava, *J. Am. Chem. Soc.* 2015, **137**, 11542-11545.
- 4 J. Zhu, Y. Ge, D. Kim, Y. Lu, C. Chen, M. Jiang and X. Zhang, *Nano Energy* 2016, **20**, 176-184.
- 5 P. Zhu, J. Zhu, J. Zang, C. Chen, Y. Lu, M. Jiang, C. Yan, M. Dirican, R. Kalai Selvan and X. Zhang *J. Mater. Chem. A* 2017, **5**, 15096-15104.
- 6 L. Wang, J. Liu, S. Haller, Y. Wang and Y. Xia, *Chem. Commun.* 2015, **51**, 6996-6999.
- 7 D. Yang, L. He, Y. Liu, W. Yan, S. Liang, Y. Zhu, L. Fu, Y. Chen and Y. Wu, *J. Mater. Chem. A* 2019, **7**, 13679-13686.
- 8 G. Ma, Z. Wen, Q. Wang, C. Shen, P. Peng, J. Jin and X. Wu, *J. Power Sources* 2015, **273**, 511-516.
- 9 M. Shaibani, A. Akbari, P. Sheath, C.D. Easton, P.C. Banerjee, K. Konstas, A. Fakhfour, M. Barghamadi, M. M. Musameh, A.S. Best, T. R  ther, P. J. Mahon, M. R. Hill, A. F. Hollenkamp and M. Majumder, *ACS Nano* 2016, **10**, 7768-7779.
- 10 F. Wu, J. Qian, R. Chen, Y. Ye, Z. Sun, Y. Xing and L. Li, *J. Mater. Chem. A* 2016, **4**, 17033-17041.
- 11 Z. Wang, L. Wang, S. Liu, G. Li and X. Gao, *Adv. Funct. Mater.* 2019, **29**, 1901051.
- 12 Y. Wang, R. Zhang, J. Chen, H. Wu, S. Lu, K. Wang, H. Li, Harris, Christopher J, K, Xi,

Kumar, Ramachandran Vasant and S, Ding, *Adv. Energy Mater.* 2019, **9**, 1900953.

13 H. Yuan, H. Peng, B. Li, J. Xie, L. Kong, M. Zhao, X. Chen, J. Huang and Q. Zhang, *Adv.*

*Energy Mater.* 2019, **9**, 1802768
